# Supplementary material for: Multi-step recognition of potential 5' splice sites by the Saccharomyces cerevisiae U1 snRNP
Source: eLife journal article supplement (doi:10.7554/elife.70534), 2022-08-12
Supplement: supp [file elife-70534-supp-v1.zip]

Archive with 14 entries (14 files):
- elife_poa_e70534_Figure_1_figure_supplement_1.pdf
- elife_poa_e70534_Figure_1_figure_supplement_2.pdf
- elife_poa_e70534_Figure_1_figure_supplement_3.pdf
- elife_poa_e70534_Figure_1_figure_supplement_4.pdf
- elife_poa_e70534_Figure_1_source_data_1.docx
- elife_poa_e70534_Figure_1_source_data_2.docx
- elife_poa_e70534_Figure_1_source_data_3.docx
- elife_poa_e70534_Figure_2_source_data_1.docx
- elife_poa_e70534_Figure_3_source_data_1.docx
- elife_poa_e70534_Figure_4_source_data_1.docx
- elife_poa_e70534_Figure_5_source_data_1.docx
- elife_poa_e70534_Figure_6_source_data_1.docx
- elife_poa_e70534_Figure_1_figure_supplement_2_source_data_1.zip
- elife_poa_e70534_Transparent_Reporting_File.pdf
