# Supplementary material for: Multi-step recognition of potential 5' splice sites by the Saccharomyces cerevisiae U1 snRNP
Source: eLife journal article supplement (doi:10.7554/elife.70534), 2022-08-12
Supplement: supp [file elife-70534-supp-v1.zip › elife_poa_e70534_Figure_1_source_data_2.docx]

**Figure 1-Source Data 2**

| **RNAa** | **Nb** | **Tau0 (τ0, s)** | **Tau1 (τS, s)** | **Tau2 (τL, s)** | **AL** | **LLRb** |
| --- | --- | --- | --- | --- | --- | --- |
| **RNA-10** | 300 | 155.0 ± 14.0 | 49.2 ± 15.5 | 355.4 ± 115.3 | 0.39 ± 0.12 | *p* < 0.01 |
| **RNA-4+2** | 175 | 55.1 ± 12.5 | 7.8 ± 2.0 | 214.0 ± 87.1 | 0.22 ± 0.05 | *p* < 0.01 |
| **RNA-C** | 26 |  |  |  |  |  |

a Data collected at 1 frame per second

bNumber of dwell times combined from replicates for maximum likelihood estimations of single (τ0) and double exponential distributions (τS, τL, AL). RNA-C had too few events for reliable dwell time analysis

c Results of a loglikelihood ratio test (LLR) comparing the goodness of fit of single and double exponential estimates evaluated at α = 0.01, where *p* < 0.01 favors a double exponential distribution
