# Supplementary material for: Multi-step recognition of potential 5' splice sites by the Saccharomyces cerevisiae U1 snRNP
Source: eLife journal article supplement (doi:10.7554/elife.70534), 2022-08-12
Supplement: supp [file elife-70534-supp-v1.zip › elife_poa_e70534_Figure_2_source_data_1.docx]

**Figure 2-Source Data 1**

| **RNA** | **Na** | **kassociationb** |
| --- | --- | --- |
| RNA-10 | 91 | 7.18 ± 2.04 |
| RNA-9a | 95 | 2.90 ± 0.16 |
| RNA-9b | 124 | 2.93 ± 0.23 |
| RNA-8a | 153 | 2.96 ± 0.12 |
| RNA-8b | 77 | 2.32 ± 0.19 |
| RNA-7a | 87 | 1.68 ± 0.07 |
| RNA-7b | 46 | 1.02 ± 0.04 |
| RNA-6a | 44 | 1.57 ± 0.07 |
| RNA-6b | 41 | 0.99 ± 0.07 |
| RNA-4+2 | 85 | 2.95 ± 0.16 |
|  |  | *( x 10-3 sec-1 )* |

**a** *N* represents the number of measured time intervals

**b** kassociation determined for experiments where [RNA] = 10 nM
