# Supplementary material for: Multi-step recognition of potential 5' splice sites by the Saccharomyces cerevisiae U1 snRNP
Source: eLife journal article supplement (doi:10.7554/elife.70534), 2022-08-12
Supplement: supp [file elife-70534-supp-v1.zip › elife_poa_e70534_Figure_6_source_data_1.docx]

**Figure 6-Source Data 1**

| **RNA** | **Tau (τo, s)a** | **Log-likelihood**  **(1 exponential term) b** | **Tau1 (τS, s) c** | **Tau2  (τL, s)c** | **ASc** | **ALc** | **Log-likelihood**  **(2 exponential terms)d** |
| --- | --- | --- | --- | --- | --- | --- | --- |
| **RNA-2+7 - A(+1)** | 7.5 ± 0.5 | -1563.0 | 6.9 ± 0.2 | 92.0 ± 42.4 | 0.99 ±0.01 | 0.01 | -1543.3 |
| **RNA-2+7 - C(+1)** | 13.8 ± 2.8 | -322.3 | 8.6 ± 1.1 | 72.2 ± 33.2 | 0.90 ± 0.07 | 0.10 | -308.9 |
| **RNA-2+7 - U(+1)** | 12.1 ± 3.7 | -1563.0 | 7.1 ± 0.6 | 188.1 ± 68.1 | 0.97 ± 0.02 | 0.03 | -284.3 |

**a** Fit parameter to an equation containing a single exponential term.

**b** Log-likelihood output for the fit to an equation with a single exponential term.

**c** Fit parameters to an equation containing two exponential terms. AS is the amplitude of the first exponential term, τS. AL is the amplitude of the second exponential term, τL.

**d** Log-likelihood output for the fit to an equation with two exponential terms. The more positive log-likelihood indicates these data are better fit to equations containing two terms.
