# Supplementary figures and images for: Multi-step recognition of potential 5' splice sites by the Saccharomyces cerevisiae U1 snRNP
Source: eLife journal article supplement (doi:10.7554/elife.70534), 2022-08-12

**A**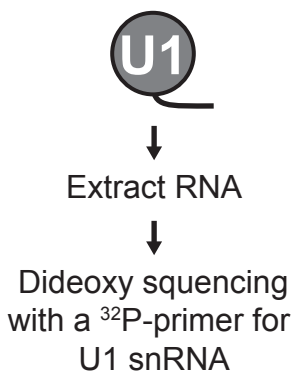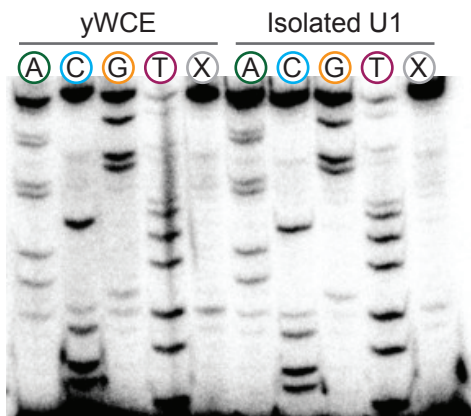

U1 snRNA: 5' - AUACUUACCU  
cDNA: 3' - TATGAATGGA

**B**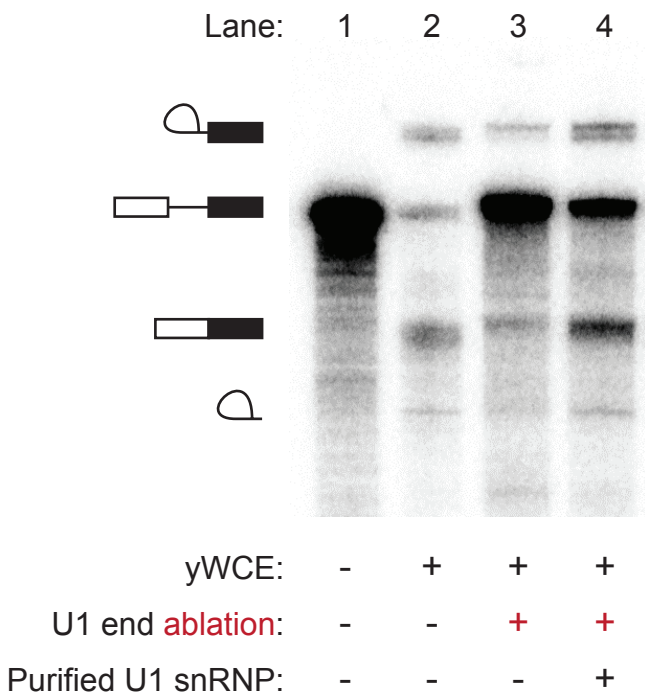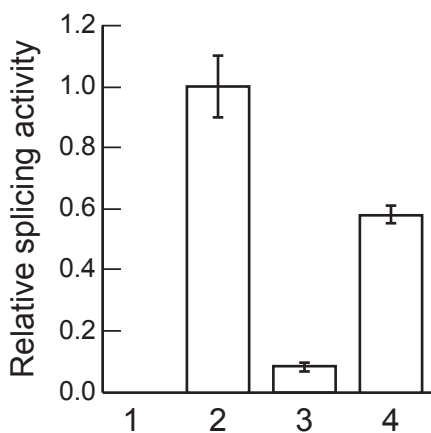

Supplement: supp [file elife-70534-supp-v1.zip]

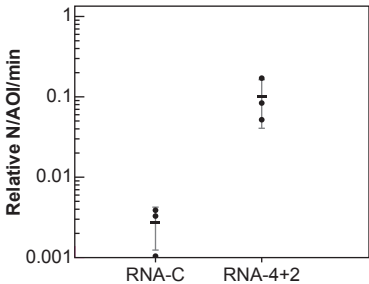

Supplement: supp [file elife-70534-supp-v1.zip]

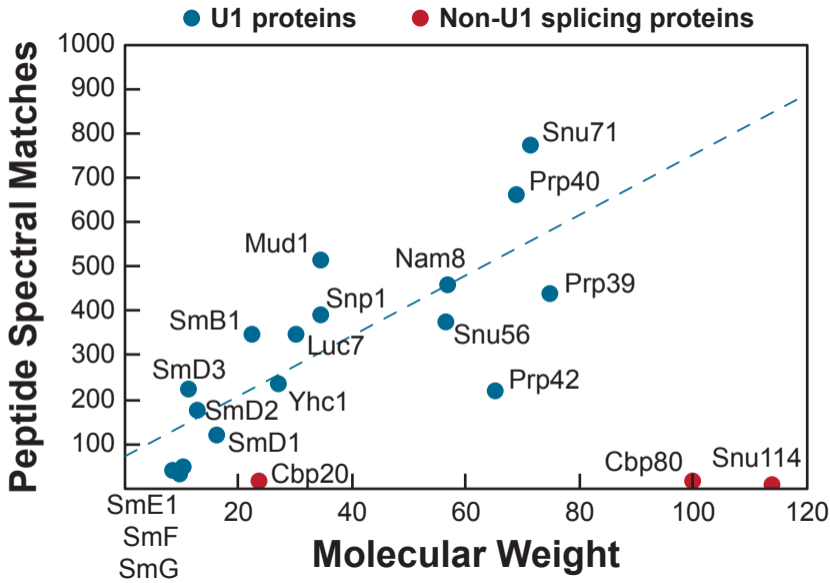

Supplement: supp [file elife-70534-supp-v1.zip › elife_poa_e70534_Figure_1_figure_supplement_1.pdf]

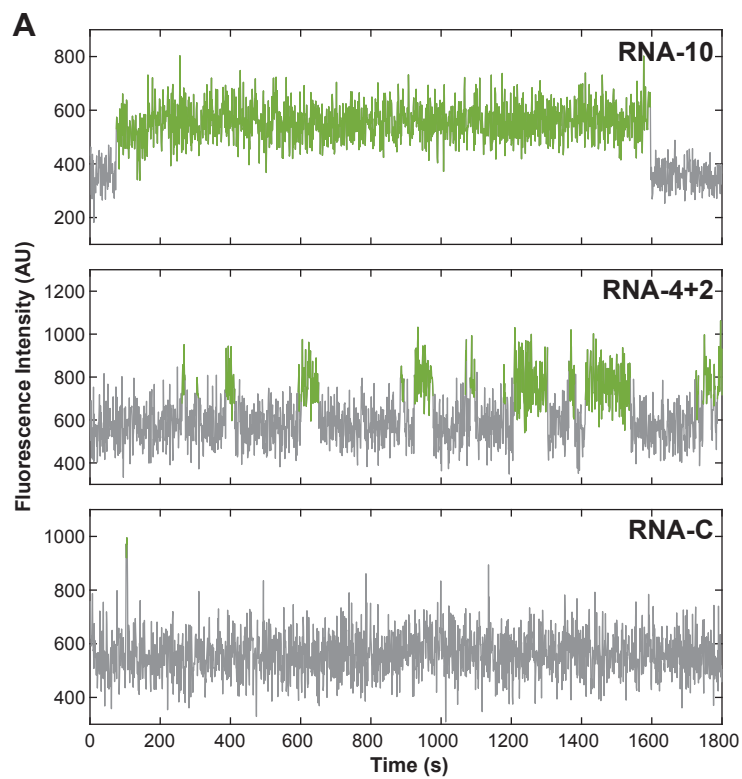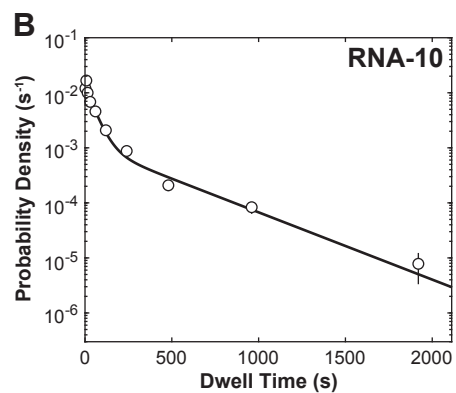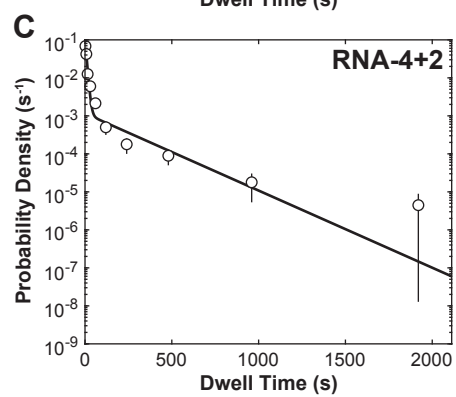

Supplement: supp [file elife-70534-supp-v1.zip › elife_poa_e70534_Figure_1_figure_supplement_4.pdf]
